# Supplementary material
Source: PubMed Central journal article supplement (PMC5436935)

# S. Figure 1

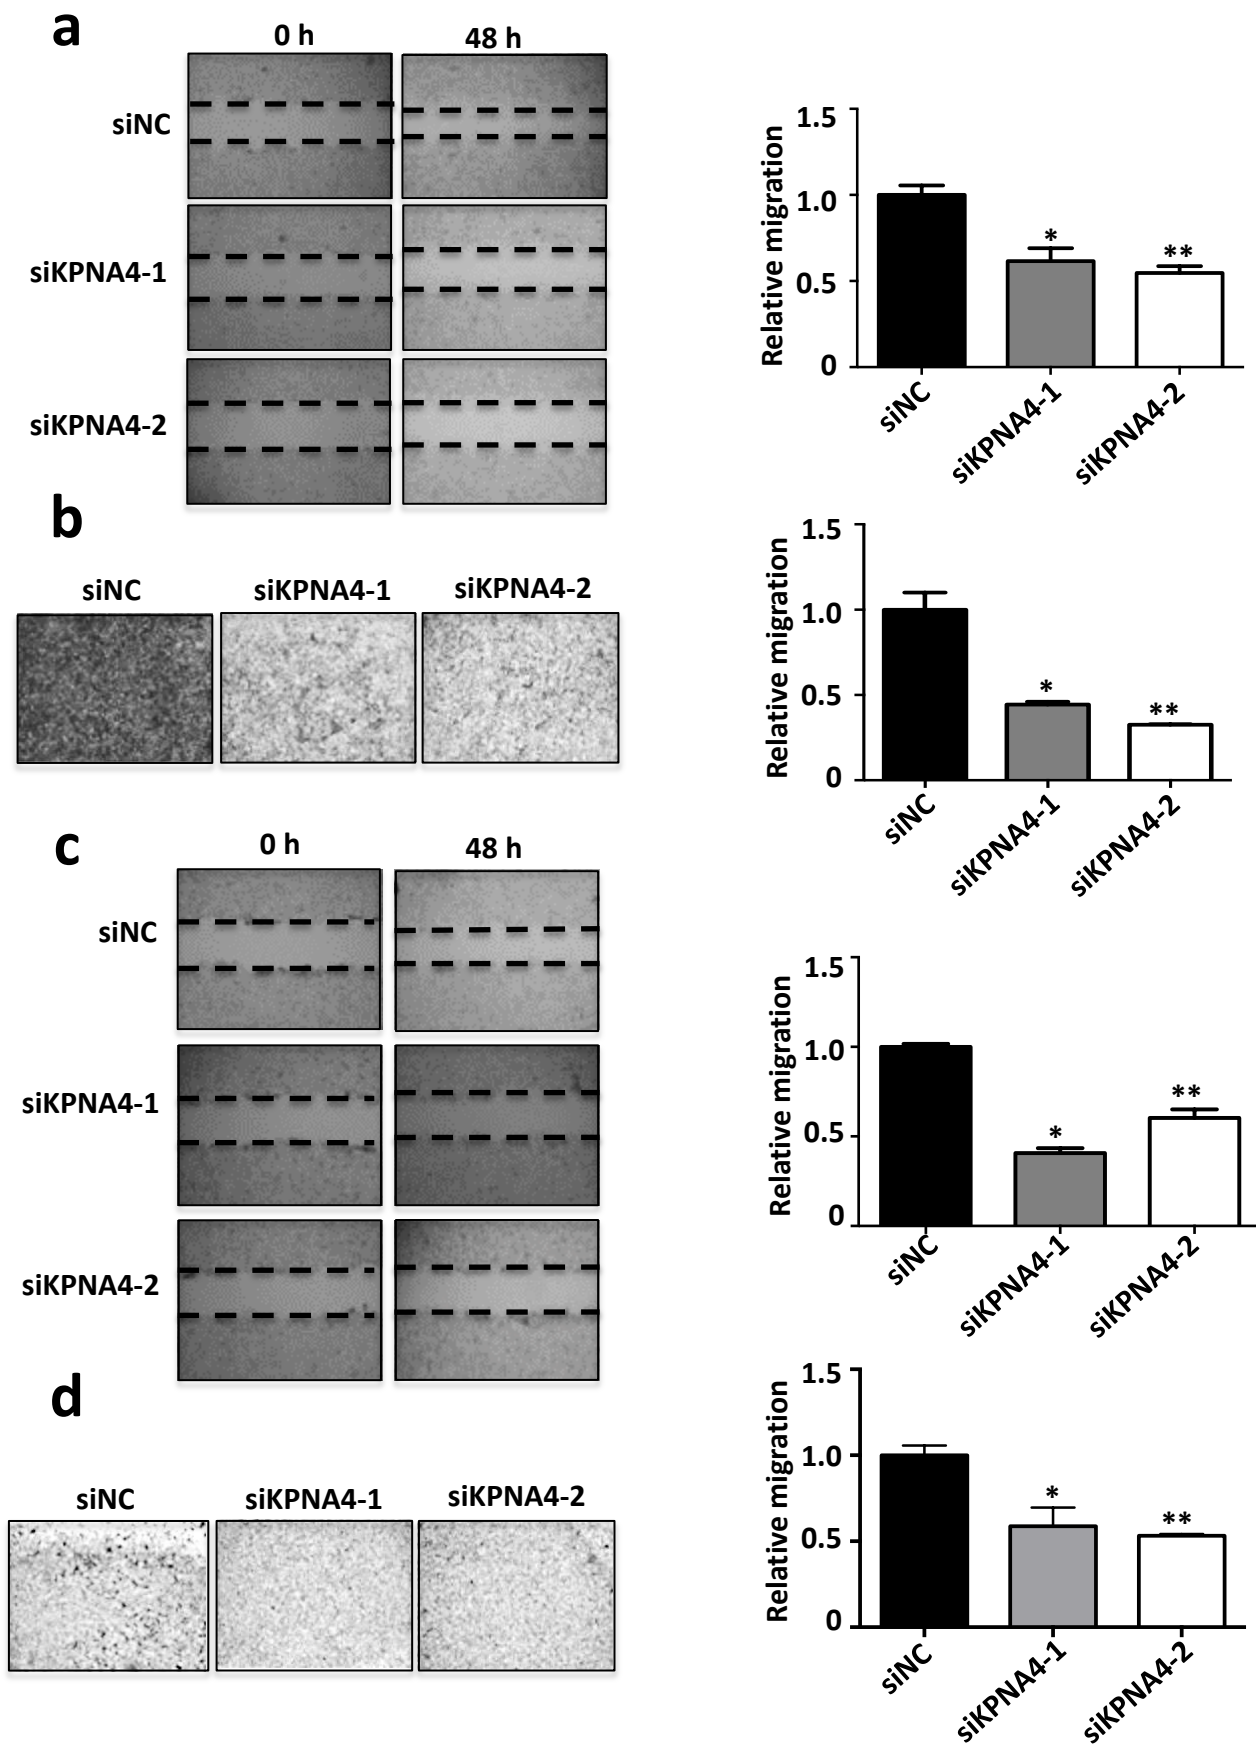

# S. Figure 2

**a**

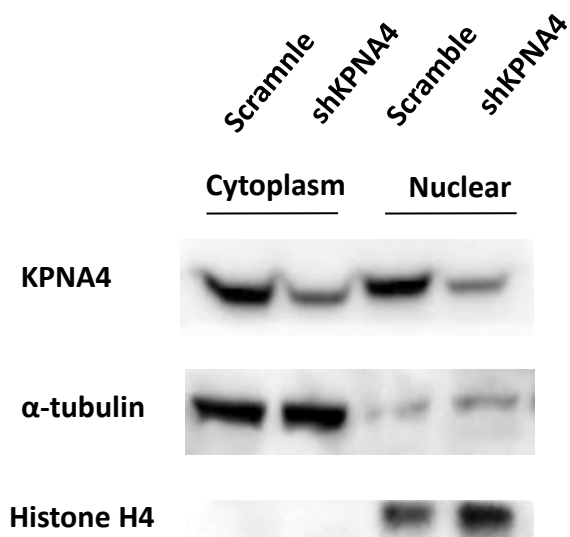

**b**

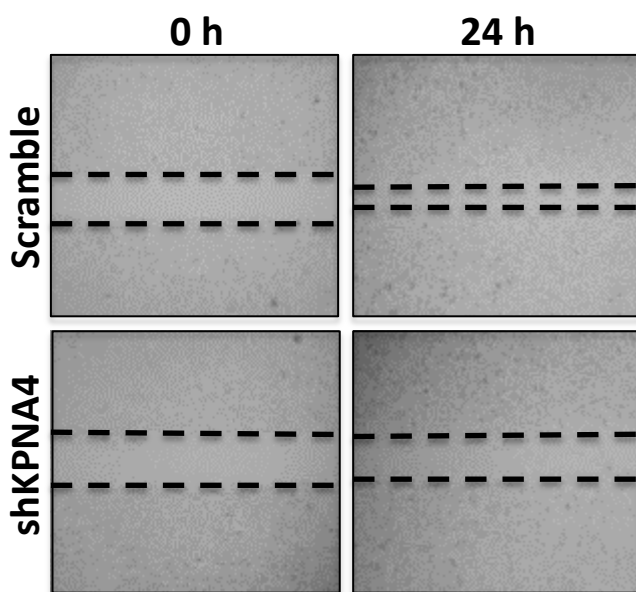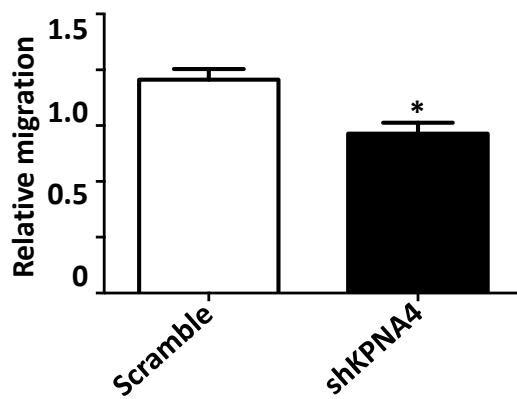

**c**

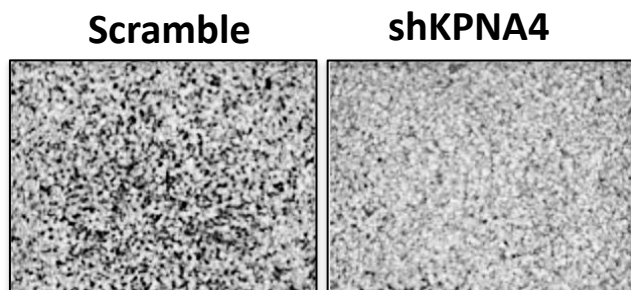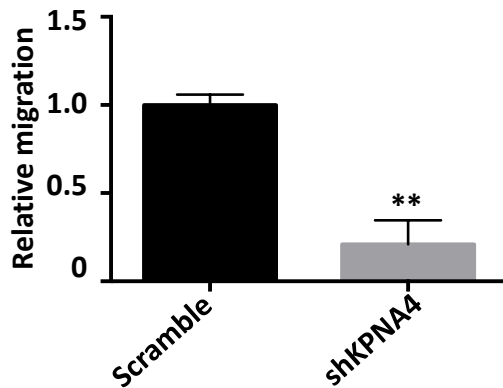

# S. Figure 3

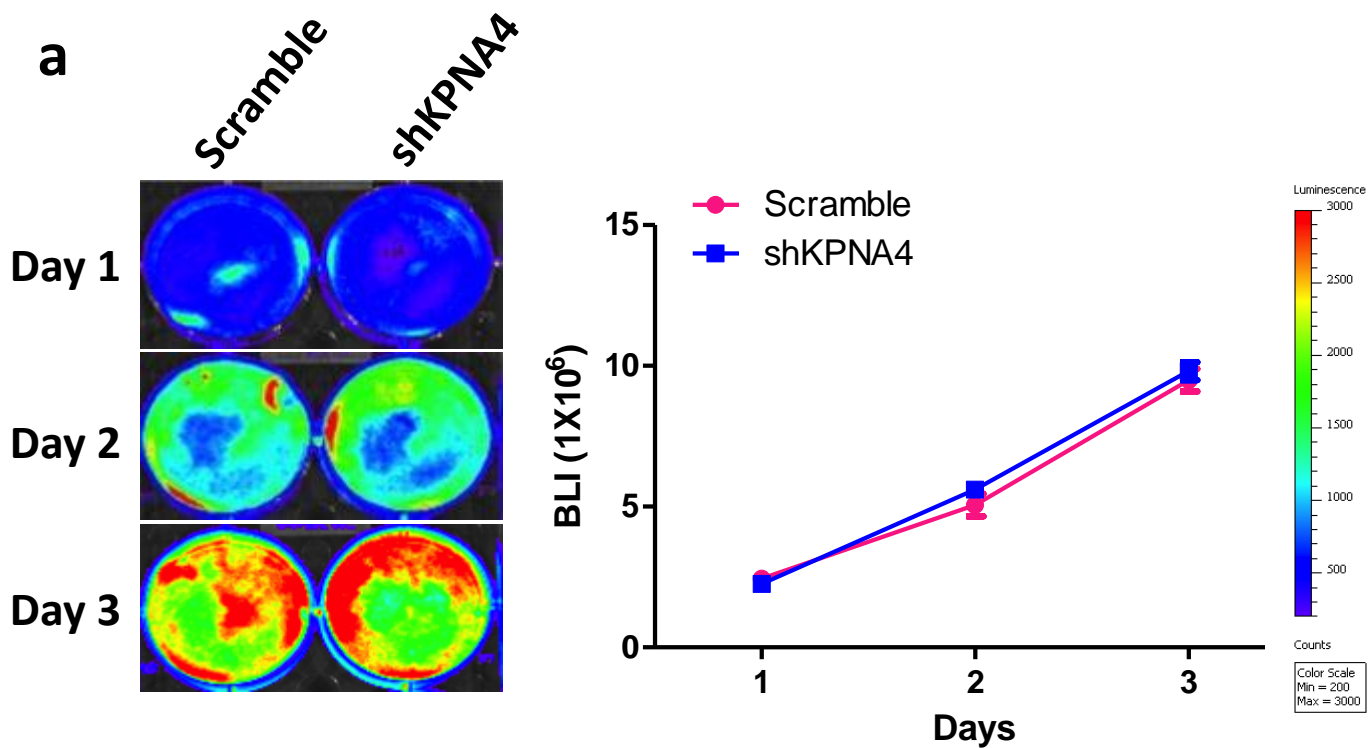

**b**

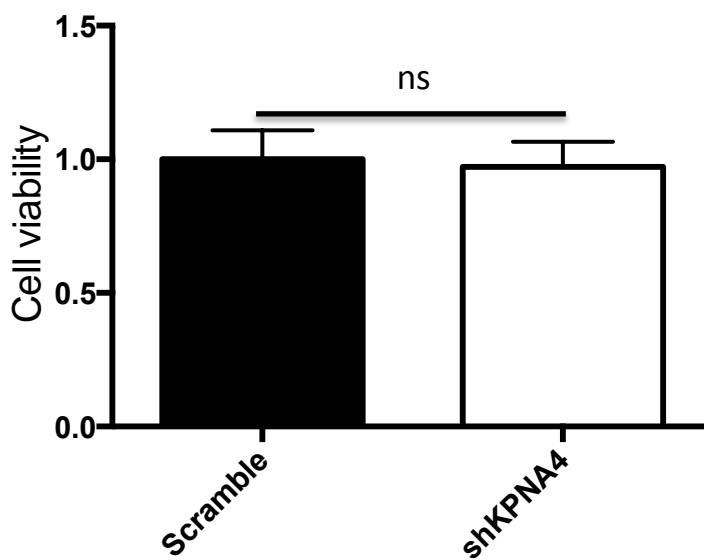

# S. Figure 4

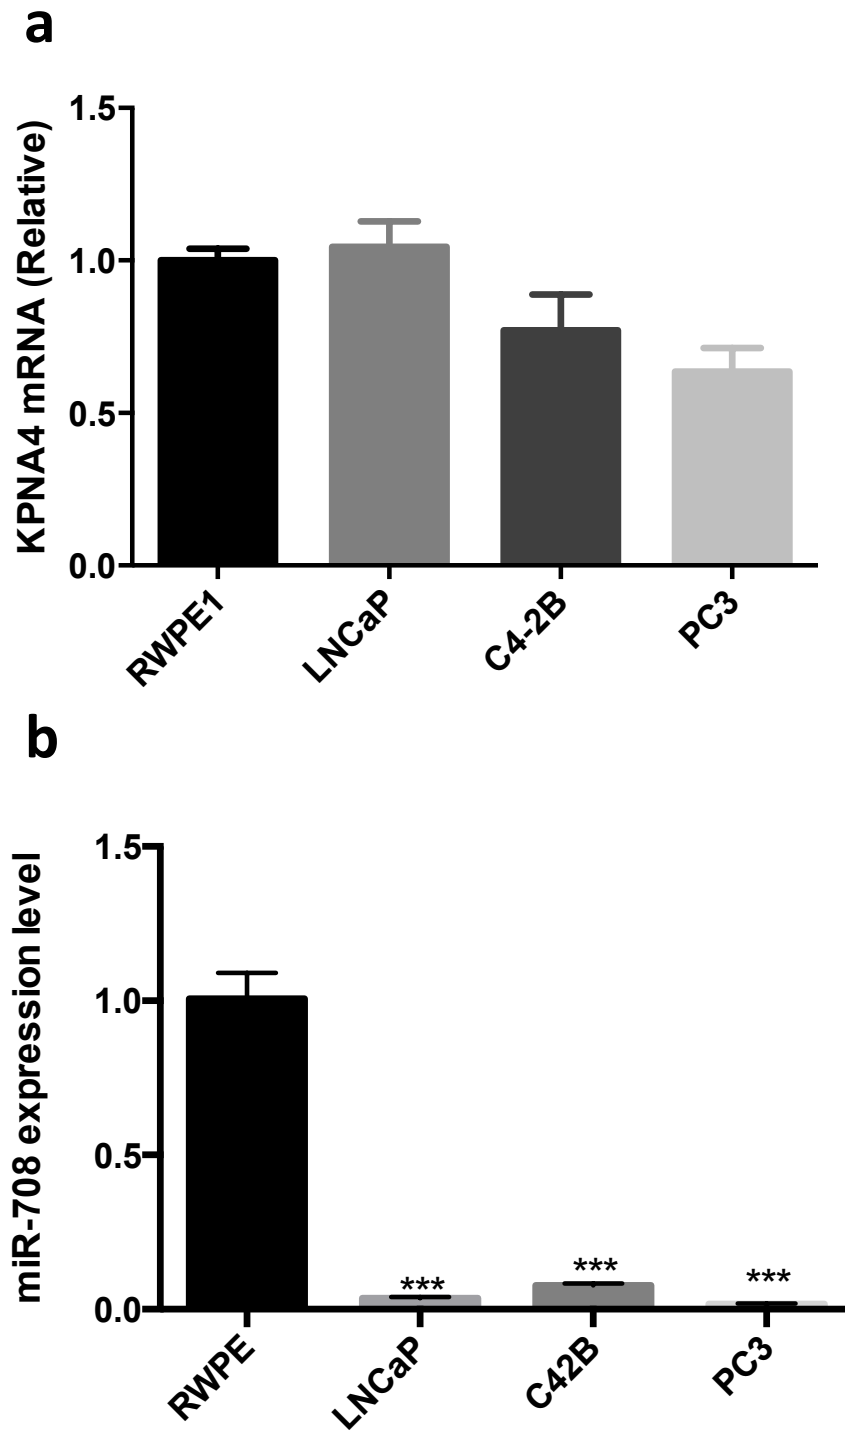

# S. Figure 5

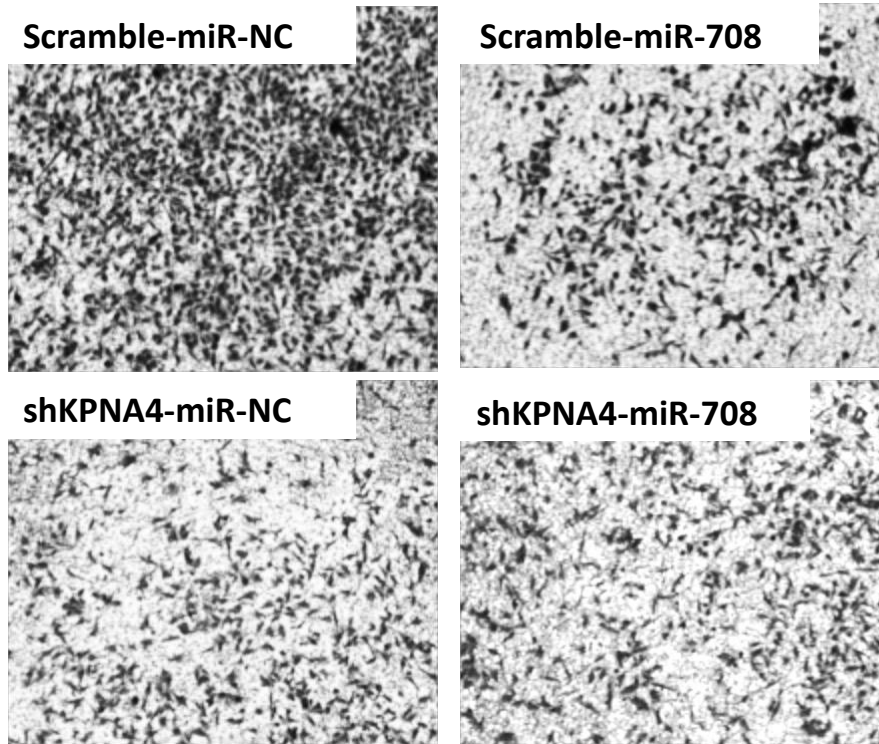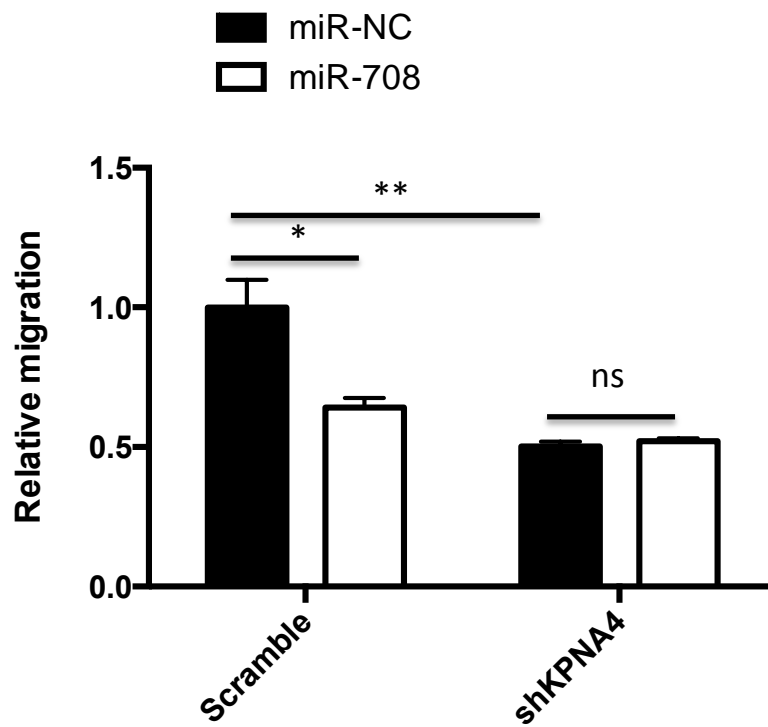

# S. Figure 6

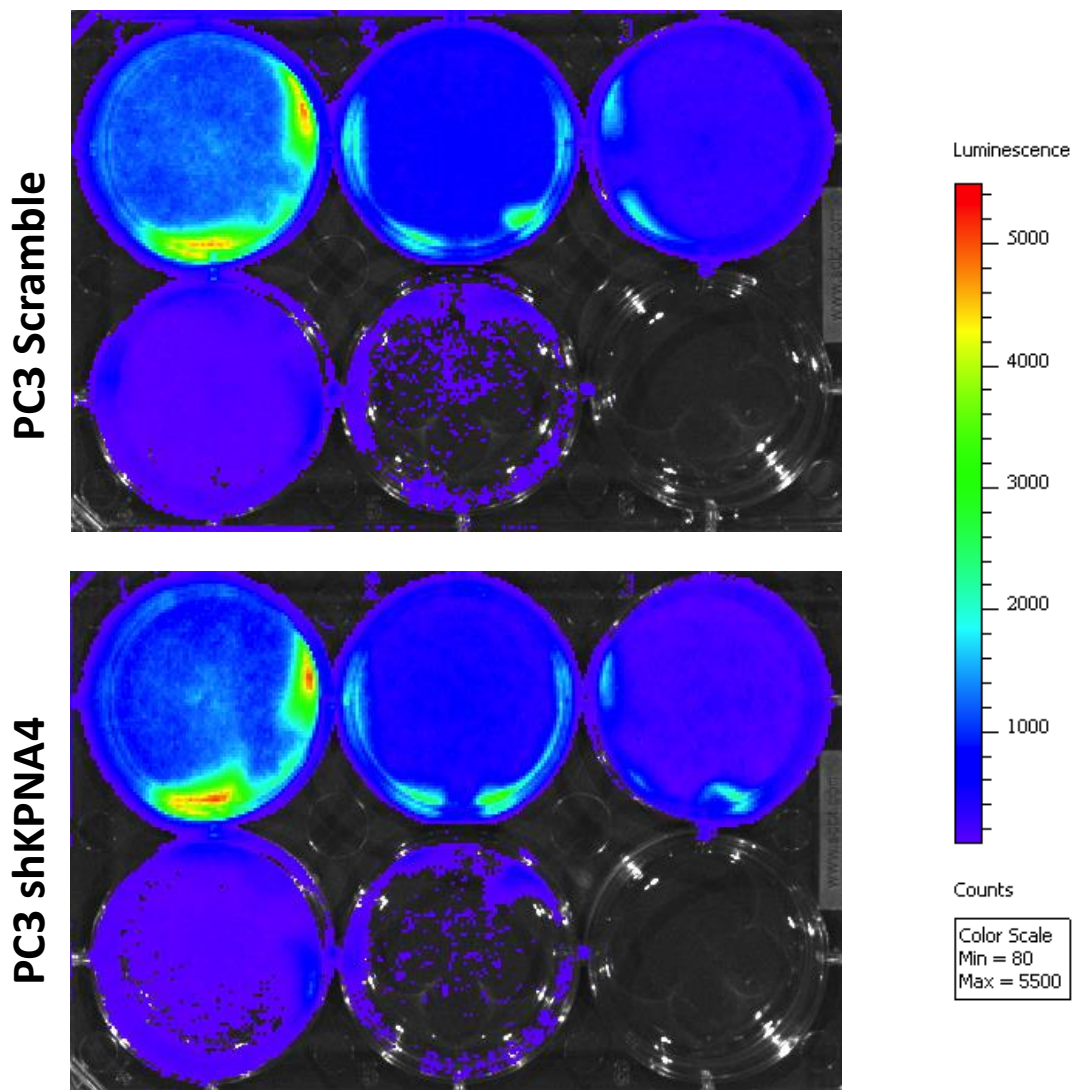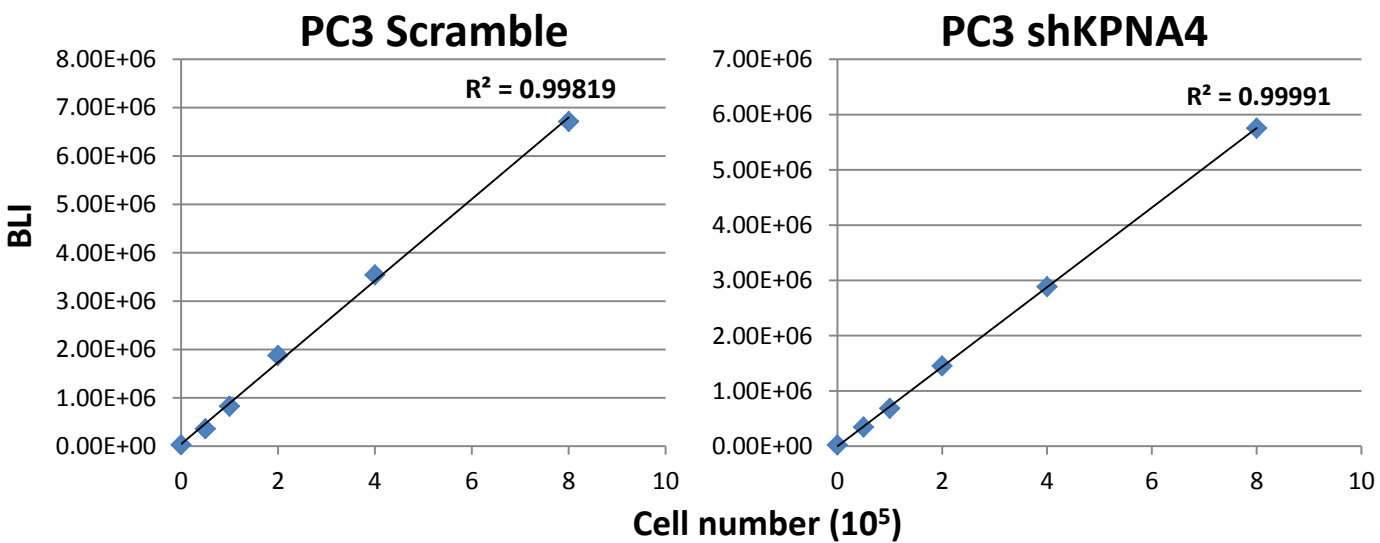

# S. Figure 7

Scramble

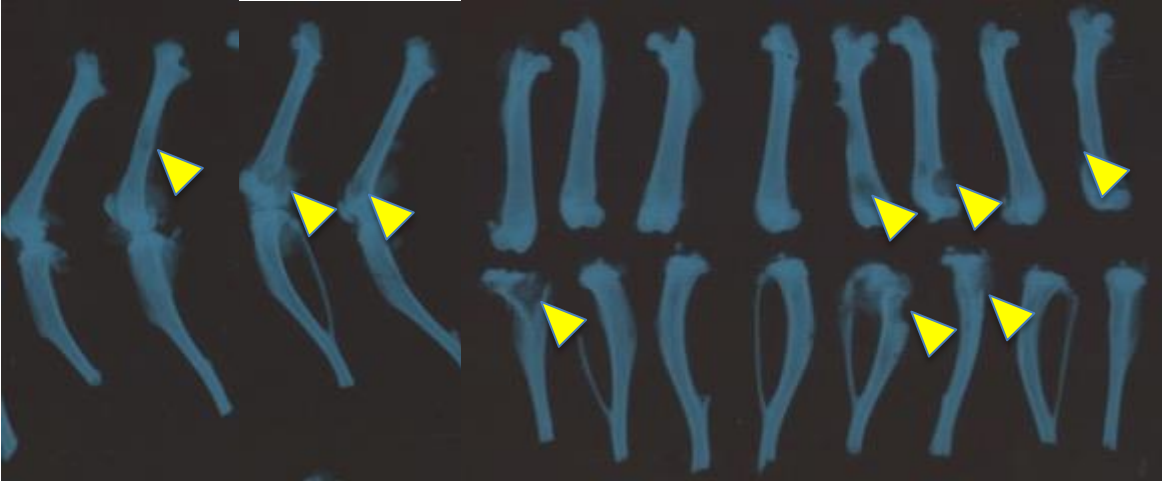

shKPNA4

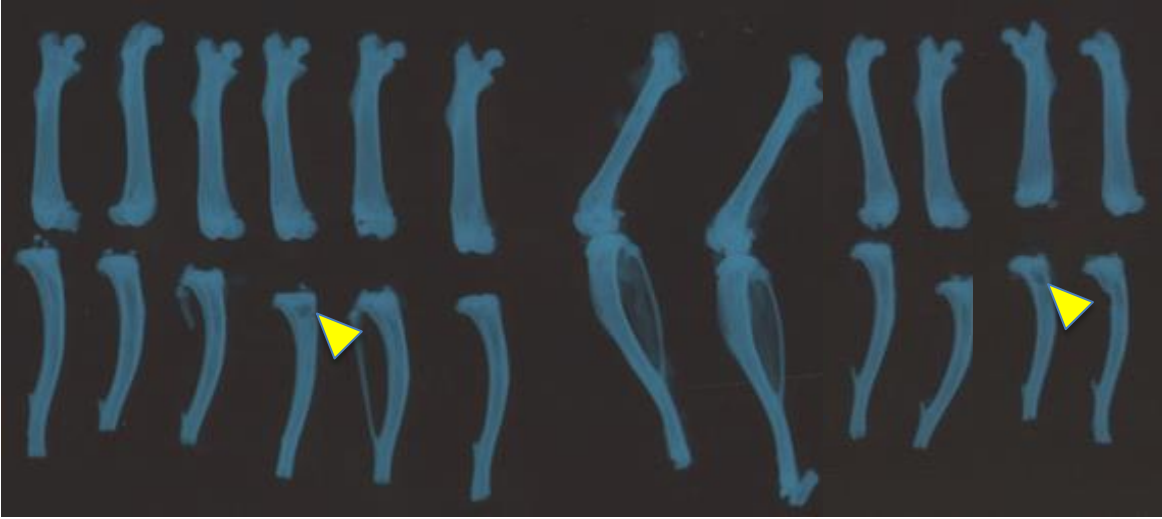

# S. Figure 8

a

Scramble

shKPNA4

TNF- $\alpha$ / $\beta$

TNF- $\alpha$ / $\beta$

b

c

■ Control  
■ KPNA4  
□ KPNA4+QNZ

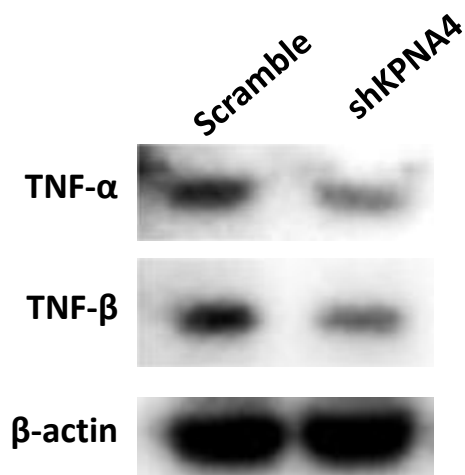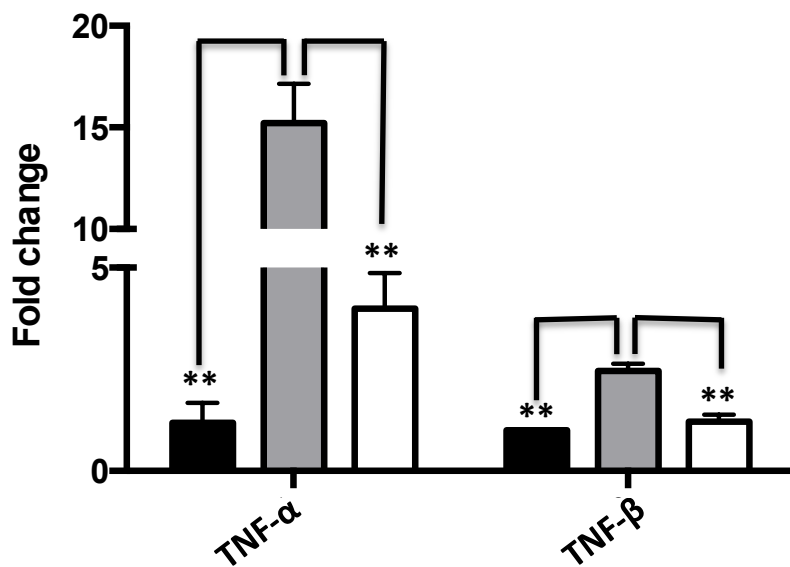



# S. Figure 9

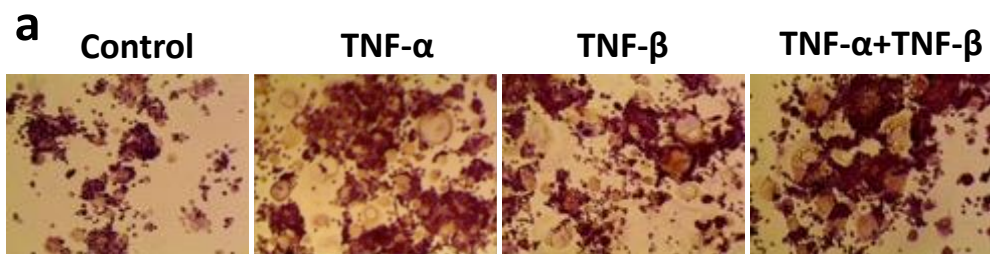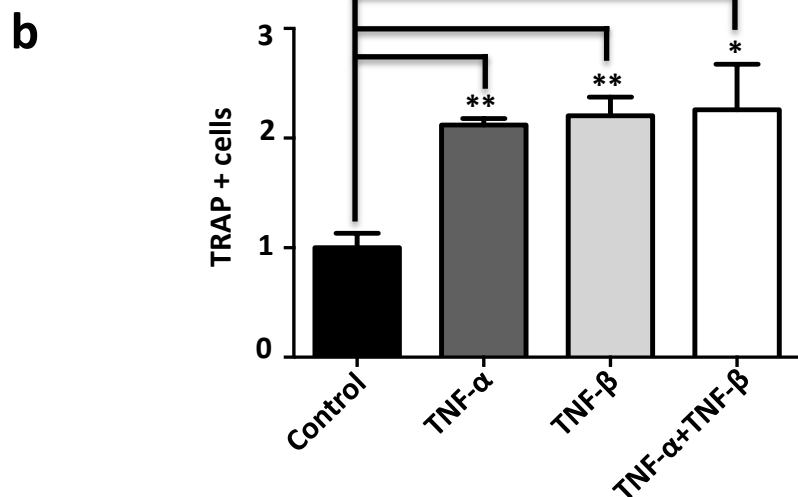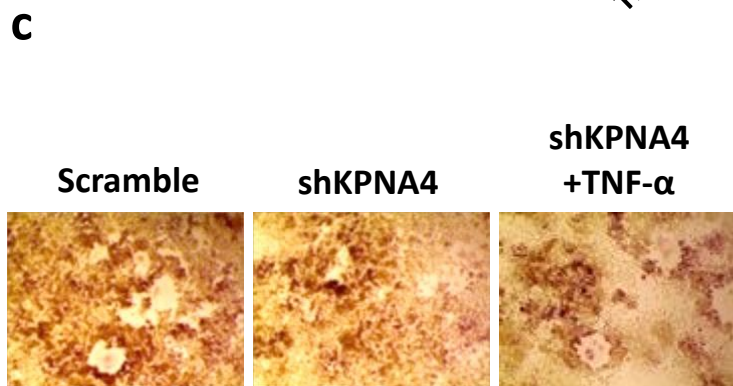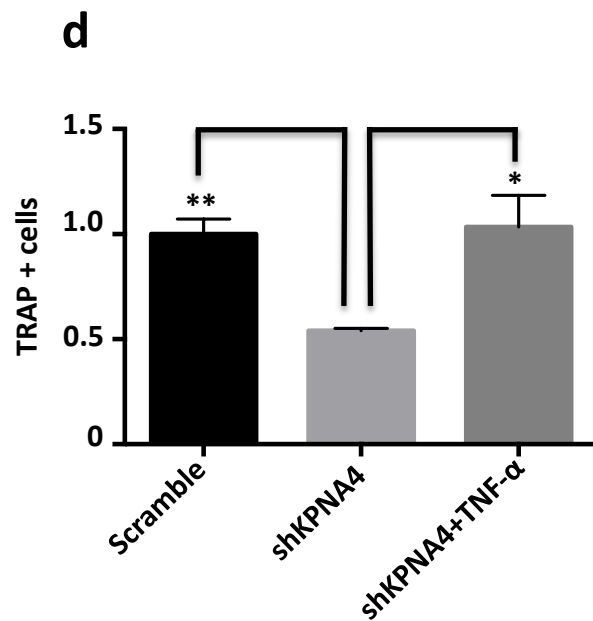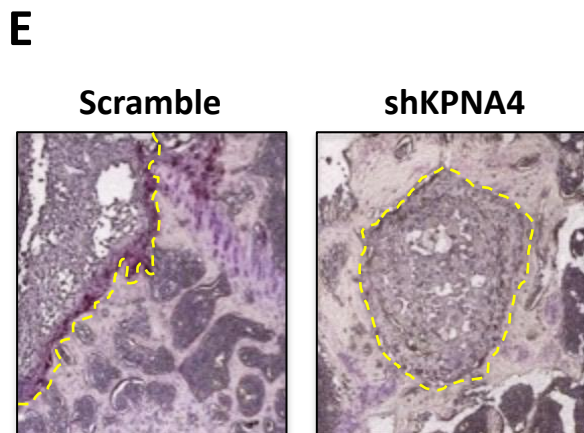

# S. Figure 10

a

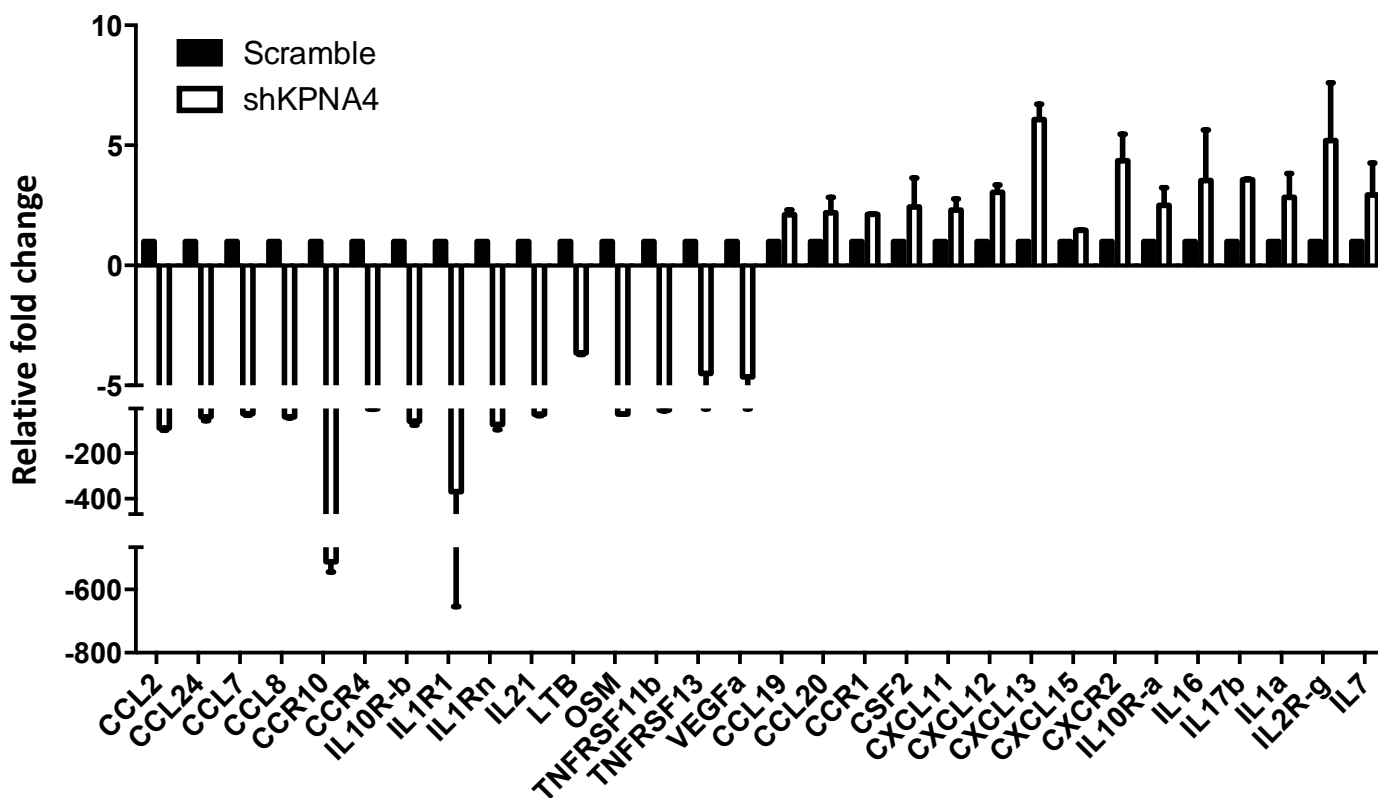

b

shKPNA4 VS Scramble

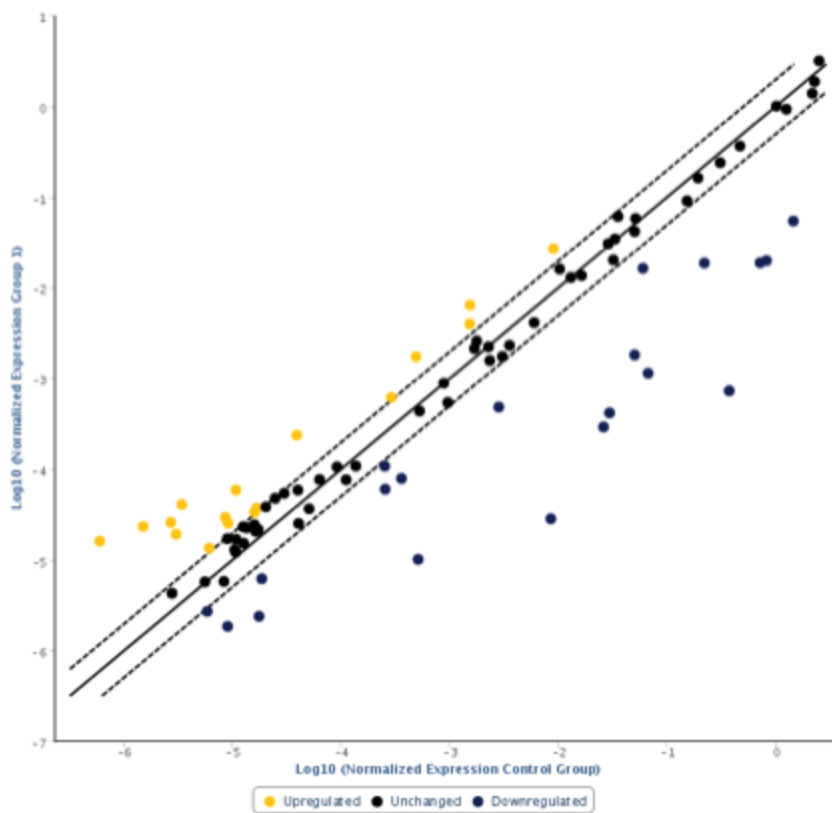

Supplement: NIHMS841712-supplement-Supplemental_Figures.pdf [file NIHMS841712-supplement-Supplemental_Figures.pdf]
